# Supplementary material for: Rapid Detection and Identification of Uveitis Pathogens by Qualitative Multiplex Real-Time PCR
Source: PubMed Central journal article supplement — Invest Ophthalmol Vis Sci. 2018 Jan;59(1):582–9. doi: 10.1167/iovs.17-22597 (PMC5788046; doi:10.1167/iovs.17-22597), 2018-01
Supplement: iovs-59-01-20_s01.pdf [file iovs-59-01-20_s01.pdf]

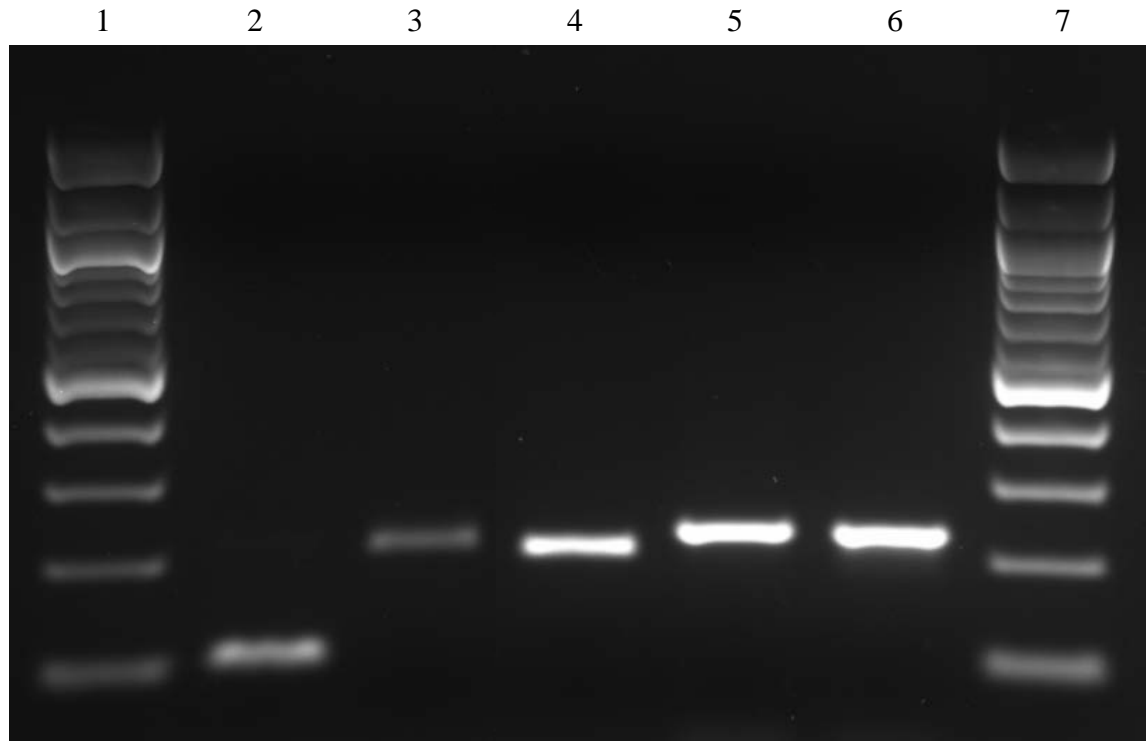

Figure S1. Amplification of each target generates the expected product size by gel electrophoresis, lanes 1 and 7, molecular weight (100bp); 2, *T. gondii*; 3, VZV; 4, CMV; 5, HSV-1; 6, HSV-2
